# Supplementary material for: Costs of Drug Development and Research and Development Intensity in the US, 2000-2018
Source: PubMed Central journal article supplement (PMC11214120; doi:10.1001/jamanetworkopen.2024.15445), 2024-06-28
Supplement: jamanetwopen-e2415445-s002.pdf [file jamanetwopen-e2415445-s002.pdf]

## Data Sharing Statement

Sertkaya. Costs of Drug Development and Research and Development Intensity in the US, 2000-2018. *JAMA Netw Open*. Published June 17, 2024.

doi:10.1001/jamanetworkopen.2024.15445

### Data

**Data available:** No

### Additional Information

**Explanation for why data not available:** Several data sources are proprietary and covered by data use agreements in place with third-party providers.
